# Supplementary material
Source: HighWire-hosted journal article supplement (https://ez-admanager.com/highwire/filestream/136822/field_highwire_adjunct_files/0/hansson_930.pdf)
Supplement: hansson_930.pdf [file hansson_930.pdf]

# Dosaje de NfL en sangre

## Un biomarcador para el diagnóstico diferencial de los parkinsonismos

Oskar Hansson, MD,  
PhD  
Shorena Janelidze, PhD  
Sara Hall, MD  
Nadia Magdalinou, MD  
Andrew J. Lees, MD,  
PhD  
Ulf Andreasson, PhD  
Niklas Norgren, PhD  
Jan Linder, MD, PhD  
Lars Forsgren, MD, PhD  
Radu Constantinescu,  
MD, PhD  
Henrik Zetterberg, MD,  
PhD  
Kaj Blennow, MD, PhD  
Para el estudio sueco  
BioFINDER

### RESUMEN

**Objetivo:** Determinar si la proteína del neurofilamento de cadena liviana (NfL) en sangre puede discriminar entre la enfermedad de Parkinson (EP) y los parkinsonismos atípicos (PA) con igual precisión diagnóstica que la NfL en LCR, y puede por lo tanto mejorar el proceso diagnóstico de los parkinsonismos.

**Métodos:** El estudio incluyó 3 cohortes prospectivas independientes: las cohortes Lund (n = 278) y Londres (n = 117), que incluyen controles sanos y pacientes con EP, parálisis supranuclear progresiva (PSP), síndrome corticobasal (SCB), y atrofia multisistémica (AMS), como también una cohorte de enfermedad temprana (n = 109) de pacientes con EP, PSP, AMS o SCB con una duración de enfermedad  $\leq 3$  años. La concentración de NfL en sangre fue medida utilizando el método de matriz de molécula única (Simoa, *Single molecule array*), y se investigó la precisión diagnóstica para distinguir la EP de los PA.

**Resultados:** Encontramos fuertes correlaciones entre las concentraciones en sangre y LCR de NfL ( $\rho \geq 0,73-0,84$ ;  $p \leq 0,001$ ). El NfL en sangre estuvo incrementado en los pacientes con AMS, PSP y SCB (por ej., todos los grupos de PA) al ser comparada con pacientes con EP, como también con controles sanos en todas las cohortes ( $p < 0,001$ ). Más aún, en la cohorte de Lund, el NfL en sangre pudo distinguir de forma precisa la EP de los PA (área bajo la curva [ABC] 0,91), con similares resultados tanto en la cohorte London (ABC 0,85) como en la cohorte de enfermedad temprana (ABC 0,81).

**Conclusiones:** La cuantificación de la concentración de NfL en sangre puede ser usada para distinguir la EP de PA. El dosaje de NfL en sangre puede ser por lo tanto utilizado en el proceso diagnóstico de pacientes con síntomas parkinsonianos tanto en la atención primaria como en clínicas especializadas.

**Clasificación de la evidencia:** Este estudio aporta evidencia Clase III de que los niveles de NfL en sangre discriminan entre la EP y los PA. *Neurology*® 2017;88:930-937

### GLOSARIO

**ABC** = área bajo la curva; **AMS** = atrofia multisistémica; **DCB** = degeneración corticobasal; **EP** = enfermedad de Parkinson; **IC** = intervalo de confianza; **LSB** = lesión de sustancia blanca; **NfL** = neurofilamento de cadena liviana; **PA** = parkinsonismos atípicos; **PSP** = parálisis supranuclear progresiva; **p-tau** = tau fosforilada; **SCB** = síndrome corticobasal; **UPDRS** = *Unified Parkinson's Disease Rating Scale* (Escala de Puntaje Unificada de la Enfermedad de Parkinson).

El diagnóstico diferencial entre la enfermedad de Parkinson (EP) y los parkinsonismos atípicos (PA), por ej., atrofia multisistémica (AMS), parálisis supranuclear progresiva (PSP) y degeneración corticobasal (DCB), es frecuentemente dificultosa debido a la sintomatología solapada, especialmente durante las etapas tempranas de la enfermedad.<sup>1,2</sup> Aunque no hay todavía métodos diagnósticos establecidos que puedan separar de forma confiable la EP de los PA, la proteína del neurofilamento de cadena liviana (NfL) en LCR es un marcador prometedor para los PA. Nuestro grupo y otros han mostrado previamente que la concentración de NfL en LCR está aumentada en los PA, pero no en la EP,<sup>3,4</sup> y que el NfL en LCR puede discriminar la EP de los PA con un alto grado de precisión diagnóstica.<sup>5-7</sup> Sin embargo, la punción lumbar no puede implementarse fácilmente en los lugares de atención primaria y muchos pacientes rechazan la punción lumbar, reduciendo la utilidad clínica de estos hallazgos. Recientemente desarrollamos un inmunoensayo ultrasensible de plataforma de matriz de molécula única (Simoa) para NfL, que es definitivamente la plataforma más sensible para detección de NfL, y aporta una mejor coherencia entre los valores de NfL en LCR y sangre en comparación con otras plataformas analíticas.<sup>8</sup> Por lo tanto investigamos si los valores de NfL en sangre estaban aumentados en los

De la Clinical Memory Research Unit (O.H., S.J., S.H.), Department of Clinical Sciences, Lund University; Memory Clinic (O.H., S.J., S.H.), Skåne University Hospital, Sweden; UCL Institute of Neurology (N.M., A.J.L., H.Z.), Queen Square, London, UK; Clinical Neurochemistry Laboratory (R.C., H.Z., K.B.), Institute of Neuroscience and Physiology (U.A.), The Sahlgrenska Academy at University of Gothenburg, Mölndal; Uman Diagnostics (N.N.), Umeå; y Department of Pharmacology and Clinical Neuroscience (J.L., L.F.), Umeå University, Sweden. Los coinvestigadores están nombrados en [Neurology.org](http://Neurology.org).

Ir a [Neurology.org](http://Neurology.org) para declaraciones de intereses completas. La información sobre fondos y aquellas declaraciones relevantes para los autores, si existiesen, se encuentran al final del artículo.

El Article Processing Charge fue pagado por el Swedish Research Council.

Este es un artículo de acceso libre distribuido bajo los términos de la Creative Commons Attribution Licence 4.0 (CC BY), que permite el uso sin restricciones, la distribución y reproducción en cualquier medio, siempre y cuando el trabajo original esté correctamente citado.

**Tabla 1** Características demográficas de la cohorte original (Lund)

|                                       | Controles   | EP                       | AMS                        | PSP                        | SCB                       |
|---------------------------------------|-------------|--------------------------|----------------------------|----------------------------|---------------------------|
| No. (% femenino)                      | 53 (57)     | 171 (37) <sup>a</sup>    | 30 (43)                    | 19 (57)                    | 5 (80)                    |
| Edad, años                            | 65 (8.4)    | 65 (10.6)                | 64 (9.1)                   | 72 (5.9) <sup>b-d</sup>    | 69 (4.9)                  |
| Duración de enfermedad, años          | NA          | 5.3 (5.2)                | 6.5 (4.3) <sup>e</sup>     | 5.9 (2.2) <sup>e</sup>     | 3.6 (1.3) <sup>f</sup>    |
| Equivalente levodopa                  | NA          | 461 (456)                | 553 (538)                  | 386 (329)                  | 235 (322)                 |
| Escala Hoehn & Yahr                   | NA          | 1,9 (0,8)                | 3,9 (1,1) <sup>g</sup>     | 4,1 (0,7) <sup>g</sup>     | 3,5 (1,7) <sup>e</sup>    |
| Puntaje de UPDRS-III motor            | 1,6 (2,6)   | 16,2 (10,3) <sup>h</sup> | 42,0 (21,1) <sup>ah</sup>  | 43,0 (15,1) <sup>ah</sup>  | 38,4 (26,7) <sup>eh</sup> |
| Test Timed up and Go                  | 8,5 (1,5)   | 9,9 (3,1) <sup>b</sup>   | 14,4 (8,7) <sup>ch</sup>   | 17,2 (4,1) <sup>ah</sup>   | 12,0 (4,4) <sup>g</sup>   |
| Marcha en tandem                      | 0,32 (0,75) | 0,64 (1,22) <sup>a</sup> | 2,76 (0,44) <sup>ah</sup>  | 2,64 (0,6) <sup>ah</sup>   | 2,25 (1,5) <sup>ae</sup>  |
| MMSE                                  | 28,4 (1,5)  | 28,5 (1,5)               | 27,8 (2,2)                 | 25,8 (4,1) <sup>ba</sup>   | 26,8 (2,9)                |
| Recuerdo de memoria tardía (ADAS-cog) | 2,2 (1,7)   | 3,5 (5,4) <sup>b</sup>   | 3,3 (2,3) <sup>a</sup>     | 4,9 (2,3) <sup>chj</sup>   | 3,4 (2,3)                 |
| NfL en LCR                            | 887 (724)   | 896 (647)                | 3.435 (1884) <sup>ah</sup> | 2.656 (822) <sup>g-i</sup> | 2.498 (848) <sup>ah</sup> |
| Aβ42 en LCR                           | 641 (198)   | 615 (160)                | 553 (181)                  | 480 (163) <sup>ae</sup>    | 538 (288)                 |
| t-tau en LCR                          | 329 (117)   | 253 (78) <sup>h</sup>    | 330 (98) <sup>g</sup>      | 276 (79) <sup>aj</sup>     | 358 (93) <sup>e</sup>     |
| p-tau en LCR                          | 52,2 (17,8) | 42,5 (12,8) <sup>h</sup> | 40,0 (16,2) <sup>h</sup>   | 43,1 (16,9) <sup>b</sup>   | 58,3 (18,4)               |

Abreviaturas: ADAS-cog = Escala de Evaluación de Enfermedad de Alzheimer-cognición; AMS = atrofia multisistémica; EP = enfermedad de Parkinson; MMSE = Examen de Estado Mínimo Mental; NA = no aplica; NfL = neurofilamento de cadena liviana; PSP = parálisis supranuclear progresiva; p-tau = tau fosforilada; SCB = síndrome corticobasal; t-tau = tau total; UPDRS = Escala de Puntaje de Enfermedad de Parkinson Unificada.

Los datos son dados como media (DE). Los biomarcadores en LCR son dados como ng/L. Las muestras de LCR estuvieron disponibles para mediciones de NfL en 147 pacientes con EP, 28 pacientes con AMS, 15 pacientes con PSP, 5 pacientes con SCB, y 50 controles, y las muestras de LCR para mediciones de Aβ42, t-tau, y p-tau de 128 pacientes con EP, 25 pacientes con AMS, 13 pacientes con PSP, 4 pacientes con SCB, y 50 controles. Los factores demográficos y características clínicas fueron comparados utilizando las pruebas de  $\chi^2$  y de Mann-Whitney. Los biomarcadores en LCR (ln-transformados) fueron analizados con modelos lineales generales univariados <sup>a</sup>justados para edad y sexo.

<sup>a</sup>Comparado con control,  $p < 0,05$ .

<sup>b</sup>Comparado con control,  $p < 0,01$ .

<sup>c</sup>Comparado con EP,  $p < 0,01$ .

<sup>d</sup>Comparado con AMS,  $p < 0,01$ .

<sup>e</sup>Comparado con EP,  $p < 0,05$ .

<sup>f</sup>Comparado con PSP,  $p < 0,05$ .

<sup>g</sup>Comparado con EP,  $p < 0,001$ .

<sup>h</sup>Comparado con control,  $p < 0,001$ .

<sup>i</sup>Comparado con AMS,  $p < 0,05$ .

participantes del estudio con PA (ej., PSP, AMS y DCB), en comparación con pacientes con EP y controles sanos en 3 cohortes diferentes incluyendo una cohorte con enfermedad en etapas tempranas de la enfermedad. También investigamos si el NfL en sangre puede discriminar entre la EP y los PA con la misma precisión diagnóstica que el NfL en LCR.

**MÉTODOS** Aprobaciones estándar del protocolo, registros y consentimiento de pacientes. El estudio fue realizado de acuerdo con la Declaración de Helsinki y fue aprobado por los comités de ética regionales en Lund, Londres, Umeå y Gotenburgo. Todos los participantes dieron su consentimiento informado por escrito para participar en el estudio.

**Preguntas primarias de la investigación/clasificación de la evidencia.** Nuestra pregunta primaria en la investigación fue determinar si el NfL en sangre puede discriminar entre la EP y los PA. El estudio aporta evidencia Clase III de que el NfL en sangre discrimina entre la EP y los PA con un alto grado de precisión diagnóstica.

**Participantes. Cohorte 1 (cohorte de Lund).** Se incluyeron pacientes con EP (n = 171), AMS (n = 30), PSP (n = 19), o síndrome corticobasal (SCB, n = 5) y controles neurológi-

camente sanos (n = 53), como parte de un estudio prospectivo y longitudinal *Swedish Bio-FINDER (biofinder.se)*. En las series de conveniencia, los participantes fueron reclutados en la Clínica Neurológica, *Skåne University Hospital, Lund, Sweden*, entre 2008 y 2014.<sup>9,10</sup> Los criterios para la cohorte 1 están descritos en *e-Methods* en *Neurology.org*.

**Cohorte 2 (cohorte de Londres).** Se enrolaron pacientes con EP (n = 20), AMS (n = 30), PSP (n = 29) o SCB (n = 12) y controles neurológicamente sanos (n = 26), en el *National Hospital for Neurology and Neurosurgery, Queen Square, Londres*. El estudio es prospectivo y longitudinal. Los participantes fueron enrolados consecutivamente a lo largo de un período de 2 años desde 2011 a 2013. Los criterios diagnósticos para la cohorte 2 están descritos en los *e-Methods* en *Neurology.org*.

En ambas cohortes, los controles sanos recibieron un examen completo clínico, neurológico y cognitivo. Los individuos con deterioro cognitivo o síntomas parkinsonianos no fueron incluidos en el grupo control.

**Cohorte 3 (cohorte de enfermedad temprana).** La cohorte 3 incluyó pacientes con EP (n = 53), AMS (n = 28), PSP (n = 22) o SCB (n = 6) con enfermedad en etapa temprana (duración de la enfermedad  $\leq 3$  años). Las características de reclutamiento y demográficas de la cohorte 3 están descritas en los *e-Methods*.

**Análisis bioquímicos.** Los procedimientos de extracción de muestras de sangre y LCR están descritos en los *e-Me-*

thods. Se utilizó un método sensible tipo sándwich (NF-light® ELISA kit; Uman Diagnostics AB, Umeå, Suecia) para la medición de NfL en LCR como fue previamente descrito.<sup>11,12</sup> Las concentraciones de NfL en sangre fueron medidas utilizando anticuerpos monoclonales y un calibrador del ensayo NfL, transferidos a la plataforma Simoa utilizando un kit casero (Quanterix; Lexington, MA), como fue previamente descrito.<sup>13</sup> Los detalles del desempeño del ensayo se dan en los *e-Methods*.

**RM.** En la cohorte de Lund, un subgrupo de 102 participantes del estudio, incluyendo 39 controles, 89 pacientes con EP, 7 pacientes con PSP, 8 pacientes con AMS y 2 pacientes con SCB, se realizaron una RM (descrito en los *e-Methods*).

**Análisis estadístico.** Se utilizó el SPSS (IBM, Armonk, NY) para el análisis estadístico. Un valor errático de NfL plasmático que superó 10 DE de la media fue excluido del análisis. Las asociaciones entre 2 variables continuas fueron testeadas con la correlación de Spearman o con modelos de regresión lineal. Las diferencias de grupo fueron evaluadas con la prueba de Mann-Whitney y análisis lineal univariado general. Los modelos de regresión fueron utilizados para ajustar los efectos confundidores de edad y sexo. La precisión diagnóstica del NfL en sangre fue examinada utilizando un análisis de curva de la característica operativa del receptor. Una descripción detallada del análisis estadístico se presenta en los *e-Methods*. Se consideró estadísticamente significativa una  $p \leq 0,05$ .

**RESULTADOS Características demográficas.** Los datos demográficos y clínicos de las cohortes de Lund y Londres se muestran en las tablas 1 y 2,

respectivamente. En la cohorte de Lund, los niveles de NfL en sangre se correlacionan con la edad en toda la cohorte ( $\rho = 0,449$ ;  $p < 0,001$ ), en controles ( $\rho = 0,439$ ;  $p = 0,001$ ) y en pacientes con EP ( $\rho = 0,577$ ;  $p < 0,001$ ), pero no en pacientes con PA (por ej., PSP, AMS o SCB). Los niveles de NfL en sangre fueron mayores en mujeres que en varones en toda la población ( $p = 0,041$ ) y en pacientes con EP ( $p = 0,040$ ). Encontramos resultados similares en la cohorte de Londres, donde los niveles de NfL en sangre se correlacionaron con la edad en toda la cohorte ( $\rho = 0,290$ ;  $p = 0,001$ ), en controles ( $\rho = 0,411$ ;  $p = 0,037$ ) y en pacientes con EP ( $\rho = 0,483$ ;  $p = 0,031$ ), pero no en pacientes con PA. Los niveles en sangre de NfL fueron mayores en mujeres que en hombres en los pacientes con PA solamente ( $p = 0,048$ ).

Debido a la asociación entre el INfL en sangre y la edad y el sexo, ajustamos adicionalmente el análisis estadístico como se describe abajo por los efectos confundidores de estos factores.

**Correlaciones entre los niveles de NfL en LCR y sangre. La cohorte de Lund.** El NfL en sangre se correlacionó fuertemente con el NfL en LCR en toda la cohorte ( $\rho = 0,730$ ;  $p < 0,001$ ; figura 1A). Las correlaciones fueron moderadas entre los grupos diagnósticos individuales, posiblemente por el tamaño de la muestra: controles,  $\rho = 0,572$ ,  $p < 0,001$ ; EP,  $\rho = 0,589$ ,  $p < 0,001$ ; PA,  $\rho = 0,419$ ,  $p = 0,003$ . El NfL en sangre también se correlacionó con el NfL en LCR una vez ajustados los efectos confundidores de la edad y el sexo (toda la cohorte,  $\beta = 0,697$ ,  $p <$

**Tabla 2** Características demográficas de la cohorte de validación (Londres)

|                              | Controles   | EP                         | AMS                         | PSP                          | SCB                          |
|------------------------------|-------------|----------------------------|-----------------------------|------------------------------|------------------------------|
| No. (% femenino)             | 26 (46)     | 20 (45)                    | 30 (47)                     | 29 (44)                      | 12 (83)                      |
| Edad, años                   | 61 (9.5)    | 65 (8.6)                   | 65 (5.7)                    | 71 (6.1) <sup>e-g</sup>      | 71 (7.2) <sup>b,c,h</sup>    |
| Duración de enfermedad, años | NA          | 9.7 (6.0)                  | 4.3 (2.1) <sup>f</sup>      | 5.4 (2.8) <sup>b</sup>       | 3.8 (2.2) <sup>f</sup>       |
| Escala Hoehn & Yahr          | NA          | 2.5 (0.9)                  | 3.2 (1.0) <sup>b</sup>      | 3.9 (0.9) <sup>c,i</sup>     | 3.2 (1.0) <sup>d</sup>       |
| NfL en LCR                   | 638 (291)   | 2.041 (2.908) <sup>a</sup> | 3.004 (1438) <sup>e,f</sup> | 2.284 (986) <sup>b,c,e</sup> | 2.845 (2.269) <sup>b,e</sup> |
| Aβ42 en LCR                  | 973 (313)   | 846 (282)                  | 736 (280) <sup>a</sup>      | 671 (211) <sup>a</sup>       | 745 (295)                    |
| t-tau en LCR                 | 365 (246)   | 351 (192)                  | 292 (108)                   | 306 (167)                    | 425 (289)                    |
| p-tau en LCR                 | 43,2 (22,1) | 42,0 (15,3)                | 42,9 (47,1)                 | 36,0 (12,0) <sup>b,h</sup>   | 47,3 (21,0)                  |

Abreviaturas: AMS = atrofia multisistémica; EP = enfermedad de Parkinson; NfL = neurofilamento de cadena liviana; PSP = parálisis supranuclear progresiva; p-tau = tau fosforilada; SCB = síndrome corticobasal; t-tau = tau total; UPDRS = Escala de Puntaje de Enfermedad de Parkinson Unificada.

Los datos son dados como media (DE). Los biomarcadores en LCR son dados como ng/L. Las muestras de LCR estuvieron disponibles para mediciones de NfL en 5 pacientes con EP, 29 pacientes con AMS, 26 pacientes con PSP, 11 pacientes con SCB, y 26 controles, y las muestras de LCR para mediciones de Aβ42, t-tau, y p-tau en 20 pacientes con EP, 30 pacientes con AMS, 29 pacientes con PSP, 12 pacientes con SCB, y 26 controles. Los factores demográficos y características clínicas fueron comparados utilizando las pruebas de  $\chi^2$  y de Mann-Whitney. Los biomarcadores en LCR (ln-transformados) fueron analizados con modelos lineales generales univariados ajustados para edad y sexo.

<sup>a</sup>Comparado con control,  $p < 0,05$ .

<sup>b</sup>Comparado con EP,  $p < 0,05$ .

<sup>c</sup>Comparado con AMS,  $p \leq 0,05$ .

<sup>d</sup>Comparado con PSP,  $p < 0,05$ .

<sup>e</sup>Comparado con control,  $p < 0,001$ .

<sup>f</sup>Comparado con EP,  $p < 0,01$ .

<sup>g</sup>Comparado con AMS,  $p < 0,001$ .

<sup>h</sup>Comparado con control,  $p < 0,01$ .

<sup>i</sup>Comparado con EP,  $p < 0,001$ .

0,001; controles,  $\beta = 0,344$ ,  $p = 0,033$ ; EP,  $\beta = 0,481$ ,  $p < 0,001$ ; PA,  $\beta = 0,523$ ,  $p < 0,001$ ).

**La cohorte de Londres.** Apoyando nuestros hallazgos en la cohorte de Lund, el NfL en sangre se correlacionó fuertemente con el NfL en LCR en toda la muestra ( $\rho = 0,840$ ;  $p < 0,001$ ; figura 1B). Las correlaciones fueron moderadas dentro de los grupos diagnósticos individuales: controles,  $\rho = 0,406$ ,  $p = 0,040$ ; PA,  $\rho = 0,599$ ,  $p < 0,001$ . El número de casos de EP con mediciones de NfL en LCR disponibles ( $n = 5$ ) fue demasiado bajo para realizar un análisis estadístico. El análisis de regresión lineal reveló asociaciones entre los niveles de NfL en sangre y LCR también cuando se ajustó para el efecto confundidor de la edad y el sexo (toda la cohorte,  $\beta = 0,796$ ;  $p < 0,001$ ; controles,  $\beta = 0,449$ ,  $p = 0,022$ ; PA,  $\beta = 0,677$ ,  $p < 0,001$ ).

**Niveles de NfL en sangre en los diferentes grupos diagnósticos. La cohorte de Lund.** Los niveles de NfL en sangre estuvieron claramente incrementados en la PSP, AMS y SCB en comparación con los controles (PSP,  $p < 0,001$ ; AMS,  $p < 0,001$ ; SCB,  $p < 0,001$ ), con todos los análisis ajustados para edad y sexo (figura 2A). Las diferencias significativas en el NfL en sangre entre los grupos de EP y PA no fueron afectadas cuando se controló adicionalmente para duración de enfermedad (todos,  $p < 0,001$ ).

**La cohorte de Londres.** Los resultados obtenidos en la cohorte de Londres fueron similares a aquellos obtenidos en la cohorte de Lund (figura 2B). Los niveles de NfL en sangre estuvieron claramente aumentados en la PSP, la AMS y el SCB al ser comparados con controles (PSP,  $p < 0,001$ ; AMS,  $p < 0,001$ ; SCB,  $p < 0,001$ ) y pacientes con EP (PSP,  $p$

$= 0,001$ ; AMS,  $p < 0,001$ ; SCB,  $p < 0,001$ ). Además, encontramos que en la cohorte de Londres, el NfL en sangre estaba aumentado en pacientes con EP al ser comparado con controles ( $p = 0,011$ ), pero los niveles eran mucho menores a los observados en pacientes con PA (figura 2B). Las diferencias significativas en el NfL en sangre entre los grupos de EP y PA no fueron afectadas cuando se controló adicionalmente para la duración de enfermedad (PSP,  $p = 0,011$ ; AMS,  $p = 0,002$ ; SCB,  $p < 0,001$ ).

**La cohorte de enfermedad temprana.** Debido a que el diagnóstico diferencial de los parkinsonismos es particularmente desafiante en las etapas tempranas de la enfermedad, incluimos una tercera cohorte de pacientes con una duración de enfermedad de entre 0 y 3 años. De acuerdo con los datos en las cohortes de Lund y Londres, los niveles de NfL en sangre estuvieron aumentados en la PSP ( $p < 0,001$ ), la AMS ( $p < 0,001$ ) y el SCB ( $p < 0,001$ ) en comparación con pacientes con EP en etapas tempranas de la enfermedad (figura 2C).

**La precisión diagnóstica del NfL en sangre. La cohorte de Lund.** El NfL en sangre distinguió pacientes con EP de pacientes con PA con una alta precisión (área bajo la curva [ABC] 0,91, intervalo de confianza [IC] del 95% 0,87-0,95; figura 3A) y con una especificidad del 91% y una sensibilidad del 82%. Los resultados fueron similares cuando se analizaron por separado los diferentes grupos de PA (PSP, AMS y SCB) (tabla e-1). El NfL en sangre también pudo separar de forma precisa pacientes con EP y controles agrupados junto con los PA (ABC 0,92, IC 95% 0,88-0,95, especificidad 92%, sensibilidad 82%). La precisión diagnóstica

**Figura 1** Correlaciones entre los niveles de neurofilamento de cadena liviana (NfL) en sangre y LCR

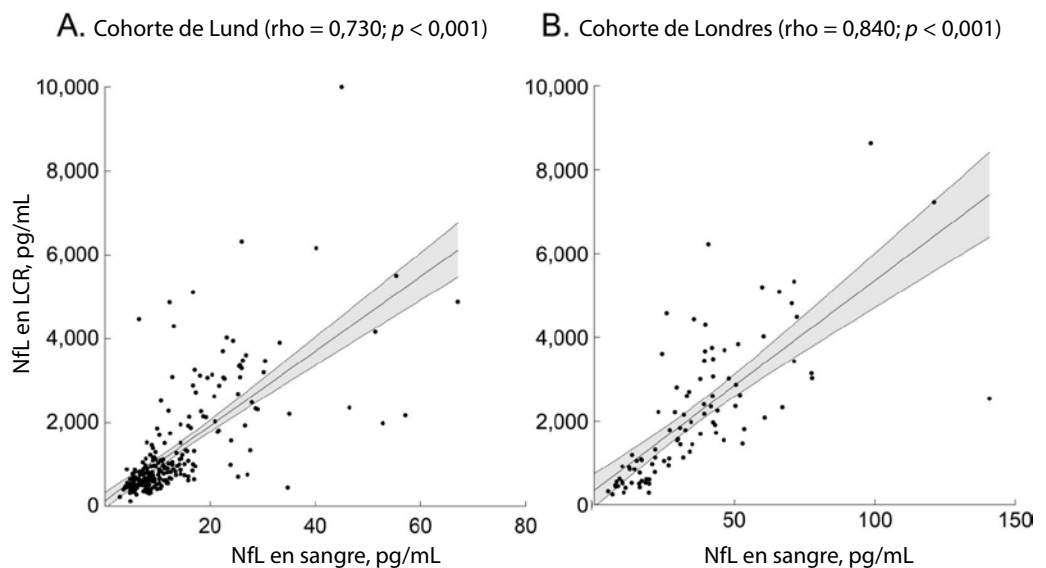

Las concentraciones de NfL en sangre y LCR fueron medidas en las cohortes de Lund (A) y Londres (B). Las mediciones de NfL de muestras pareadas de LCR estuvieron disponibles en 245 participantes en la cohorte de Lund (147 enfermedad de Parkinson [EP], 28 atrofia multisistémica [AMS], 15 parálisis supranuclear progresiva [PSP], 5 síndrome corticobasal [SCB] y 50 controles) y en 97 participantes en la cohorte de Londres (5 EP, 29 AMS, 26 PSP, 11 SCB y 26 controles).

**Figura 2 Neurofilamento de cadena liviana (NfL) en sangre en los diferentes grupos diagnósticos**

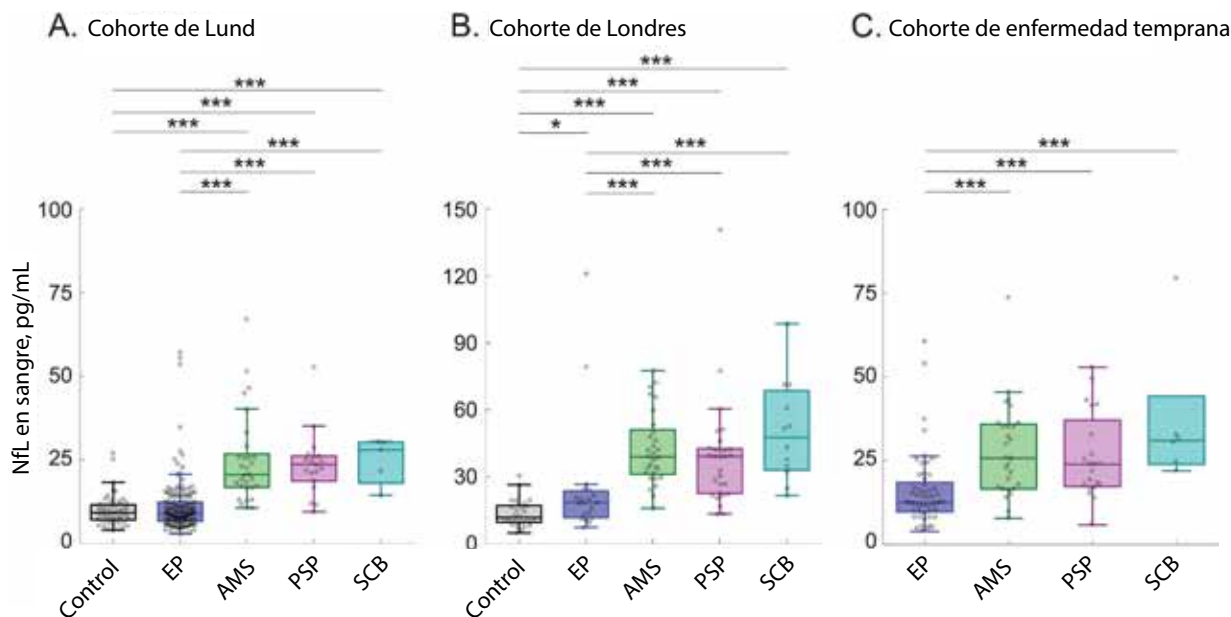

Concentraciones de NfL en sangre en las cohortes de Lund (A), Londres (B) y enfermedad temprana (C); los valores de  $p$  son de los modelos lineales univariados generales ajustados a edad y sexo; \* $p < 0,05$ ; \*\* $p < 0,01$ ; \*\*\* $p < 0,001$ . Un caso de parálisis supranuclear progresiva (PSP) en la cohorte de enfermedad temprana con concentración de NfL de 134,3 pg/mL no se muestra en C (pero fue incluido en todos los análisis estadísticos). AMS = atrofia multisistémica; EP = enfermedad de Parkinson; SCB = síndrome corticobasal.

del NfL en sangre fue tan alta como la del NfL en LCR (tabla e-2).

**La cohorte de Londres.** De igual manera, en la cohorte de Londres, el NfL en sangre pudo diferenciar EP de PA (ABC 0,85, IC 95% 0,72-0,98; figura 3B) con una especificidad del 90% y una sensibilidad del 80%. Los resultados fueron similares cuando se analizaron los grupos individuales de PA por separado (PSP, AMS y SCB) (tabla e-1). La precisión diagnóstica fue incluso mayor cuando se separó a los PA de la EP y controles

(ABC 0,91; IC 95% 0,85-0,98, especificidad 83%, sensibilidad 93%).

**La cohorte de enfermedad temprana.** De forma similar a las cohortes de Lund y Londres, el NfL en sangre pudo distinguir de forma precisa a los pacientes con EP de los PA en etapas tempranas de la enfermedad (ABC 0,81; IC 95% 0,73-0,90, especificidad 80%, sensibilidad 70%; figura 3C). Los resultados fueron comparables cuando se analizaron los grupos individuales de PA (PSP, AMS y SCB) por separado (tabla e-1).

**Figura 3 Curvas de operación del receptor (ROC) del neurofilamento de cadena liviana (NfL) en sangre**

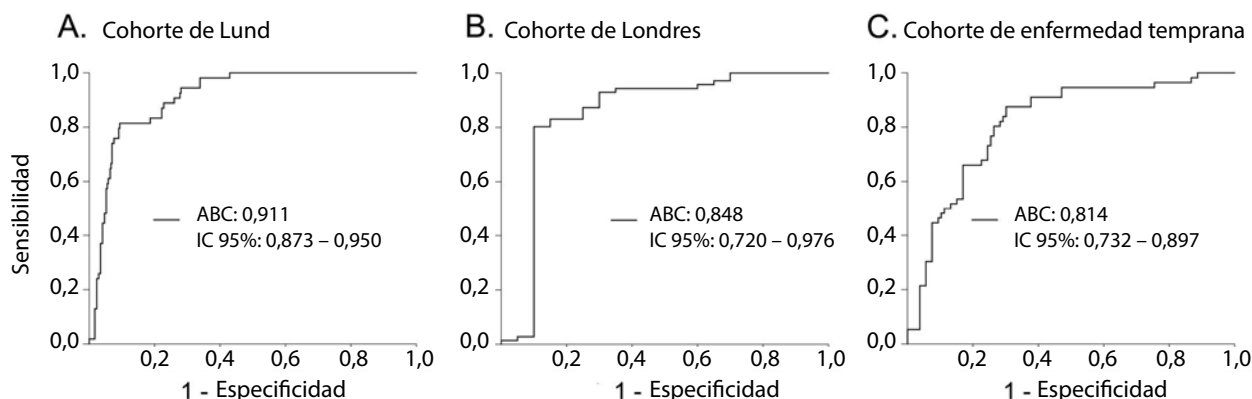

Curvas ROC de NfL en sangre para distinguir enfermedad de Parkinson (EP) de parkinsonismos atípicos (PA) (parálisis supranuclear progresiva [PSP], atrofia multisistémica [AMS] y síndrome corticobasal [SCB]) en las cohortes de Lund (A), Londres (B) y enfermedad temprana (C). La cohorte de enfermedad temprana incluyó 2 grupos de pacientes que fueron reclutados en Göteborg y Umeå, respectivamente (e-Methods). Los análisis de ROC produjeron resultados similares cuando se evaluó la precisión diagnóstica de NfL en sangre para diferenciar EP de PA en los pacientes de Göteborg (área bajo la curva [ABC] 0,80) y Umeå (ABC = 0,81) por separado.



**Correlaciones entre el NfL en sangre, biomarcadores en LCR y síntomas clínicos. La cohorte de Lund.** Primero estudiamos las asociaciones del NfL en sangre y otros biomarcadores de LCR establecidos. Todos los análisis fueron ajustados para edad y sexo. En toda la cohorte, encontramos que mayores niveles de NfL en sangre estuvieron asociados con menores niveles de A $\beta$ 42 en LCR ( $\beta = -0,201$ ;  $p = 0,001$ ) y mayores niveles de tau en LCR ( $\beta = 0,151$ ;  $p = 0,020$ ), pero no tau fosforilada (p-tau). No hubo diferencias en los niveles de NfL en sangre entre los participantes con niveles patológicos de A $\beta$ 42 en LCR vs normales (controles,  $p = 0,126$ ; EP,  $p = 0,490$ ; PA,  $p = 0,181$ ).

Después estudiamos las asociaciones entre el NfL en sangre y las características clínicas en las cohortes de EP y PA, respectivamente. En la cohorte de EP, encontramos que los niveles de NfL en sangre se correlacionaban con la duración de la enfermedad ( $\beta = 0,278$ ,  $p < 0,001$ ), el equivalente de levodopa ( $\beta = 0,235$ ;  $p = 0,003$ ), el estadio de Hoehn & Yahr ( $\beta = 0,187$ ;  $p = 0,004$ ), el puntaje motor de la *Unified Parkinson's Disease Rating Scale* (UPDRS, Escala de Puntaje Unificada de Enfermedad de Parkinson)-III ( $\beta = 0,227$ ;  $p < 0,001$ ), el *Test Timed Up and Go* ( $\beta = 0,164$ ;  $p = 0,036$ ) y la marcha en tándem ( $\beta = 0,237$ ;  $p = 0,045$ ); por ej., mayores niveles de NfL en sangre estuvieron asociados con mayor duración de enfermedad y síntomas motores agravados en la EP (los rangos de las concentraciones de NfL en sangre vs UPDRS-III, Hoehn & Yahr y duración de enfermedad se muestran en la tabla e-3). Sin embargo, en los PA, el NfL en sangre solo se correlacionó con el estadio de Hoehn & Yahr ( $\beta = 0,286$ ;  $p = 0,040$ ) y el puntaje motor de la UPDRS-III ( $\beta = 0,449$ ;  $p = 0,001$ ), pero no con la duración de la enfermedad u otras evaluaciones clínicas.

**La cohorte de Londres.** En la cohorte de Londres, mayores niveles de NfL en sangre estuvieron asociados con menores niveles de A $\beta$ 42 en LCR en toda la cohorte ( $\beta = -0,182$ ;  $p = 0,034$ ), pero no con tau y p-tau en LCR. En los grupos de EP y PA, el NfL en sangre no se correlacionó con la duración de la enfermedad o el estadio de Hoehn & Yahr.

**La cohorte de enfermedad temprana.** El NfL en sangre no estuvo asociado ni a la duración ni al estadio de Hoehn & Yahr en los grupos de EP y PA (tabla e-4).

**Correlaciones entre el NfL en sangre y las lesiones de sustancia blanca (LSB). La cohorte de Lund.** No hubo diferencias en las LSB entre los grupos diagnósticos (puntaje total de Fazekas, media  $\pm$  DE; controles,  $3,8 \pm 2,8$ ; EP,  $3,9 \pm 3,3$  y PA,  $4,1 \pm 3,3$ ). El NfL aumentado en sangre estuvo asociado con mayores puntajes de Fazekas en pacientes con EP ( $\rho = 0,328$ ;  $p = 0,002$ ), pero no en los grupos control o de PA ( $\rho = 0,309$ ;  $p = 0,056$  y  $\rho = 0,341$ ;  $p = 0,181$ , respectivamente). Sin embargo, la correlación en pacientes con EP pareció estar confundida

por los efectos de la edad y el sexo, ya que los modelos de regresión lineal ajustados para estas variables no mostraron asociaciones entre el NfL en sangre y las LSB.

**DISCUSIÓN** Los resultados de este estudio indican fuertemente que la medición de NfL en sangre puede ser usada para distinguir entre pacientes con EP y pacientes con PSP, AMS y SCB con alta precisión diagnóstica (ABC 0,81 – 0,91). La precisión diagnóstica del NfL en sangre fue tan alta como la obtenida al usar NfL en LCR. La utilidad diagnóstica del NfL en sangre para separar pacientes con EP de pacientes con PA no ha sido estudiada previamente, pero varias publicaciones han mostrado que los niveles de NfL en LCR pueden ser usados para distinguir entre estas enfermedades con ABC de entre 0,85 – 0,90.<sup>5-7</sup> Aunque otros biomarcadores de LCR y paneles de biomarcadores han sido sugeridos para diferenciar entre EP y PA,<sup>5-7</sup> no hay biomarcadores en sangre disponibles que ofrezcan la precisión diagnóstica suficiente además del NfL. Estos resultados confirman que los niveles de NfL en sangre, cuantificados con inmunoensayos de alta sensibilidad, reflejan los niveles en LCR<sup>13-15</sup> y que los niveles plasmáticos de NfL están aumentados en la PSP<sup>16</sup> y otras  $\alpha$ -sinucleinopatías.<sup>17</sup>

El NfL es un marcador de degeneración de grandes axones mielínicos.<sup>18</sup> Por lo tanto, está aumentado en el LCR de varios trastornos neurológicos, incluso condiciones agudas como el infarto cerebral<sup>19</sup> y la injuria cerebral traumática,<sup>20</sup> como también en trastornos neurodegenerativos crónicos como los PA (PSP, AMS y DCB),<sup>3-7</sup> la esclerosis lateral amiotrófica<sup>14,15,21</sup> y la demencia frontotemporal.<sup>22,23</sup> El NfL en sangre y LCR no está aumentado en la EP, que podría ser en parte por degeneración axonal menos severa y extensa en la EP en comparación con los PA. Los estudios de RM de difusión han mostrado daño extenso de sustancia blanca en la PSP, la AMS y la DCB, pero no en la EP.<sup>24-26</sup> En general, hubo niveles mayores de NfL en sangre en la EP más avanzada (tabla e-3); sin embargo, los cambios fueron mucho más modestos en comparación con aquellos observados en los PA. Estudios previos de NfL en LCR en pacientes con PA de nuestros grupos muestran que el NfL se correlaciona con la severidad de la enfermedad pero no con la duración de esta.<sup>6,7</sup> La falta de asociación entre el NfL en sangre y la duración de la enfermedad indica que la tasa de degeneración de los axones mielínicos es relativamente constante a lo largo del curso de la enfermedad en los PA. En este estudio, pudimos replicar estos hallazgos utilizando la prueba de NfL en sangre, agregando más credibilidad al NfL en sangre en los PA. Estos hallazgos juntos también sugieren que el NfL en sangre puede ser útil en ensayos clínicos para detectar los efectos del tratamiento sobre la degeneración axonal.

Es frecuentemente difícil diferenciar clínica-

mente entre la EP y los PA, particularmente durante las etapas tempranas de la enfermedad. Para el paciente individual y el cuidador, un diagnóstico temprano y correcto es muy importante. También, con la esperanza de nuevas terapias modificadoras de enfermedad, el diagnóstico temprano y correcto también es vital para identificar los pacientes que se beneficiarían de ciertos tratamientos específicos para dicha enfermedad. En varios países, el NfL en LCR ha sido mostrado en la última década como un agregado importante al proceso diagnóstico de pacientes con parkinsonismo. Sin embargo, la utilidad clínica ha sido limitada debido a la invasividad de la punción lumbar. Por lo tanto, el hallazgo de que el NfL en sangre se correlaciona y es equivalente al NfL en LCR para distinguir EP de PA puede ser altamente útil en la práctica clínica y podría incluso ser utilizado en la atención primaria. Más aún, el NfL en sangre podría ser usado en los ensayos clínicos donde pueden ser necesarias mediciones repetidas para seguir la tasa de degeneración axonal a través del tiempo.

Aunque tanto el NfL en LCR como en sangre pueden diferenciar PA de EP, el NfL no puede separar la PSP, la AMS y la DCB entre sí. Sin embargo, niveles aumentados de NfL en sangre en un paciente con parkinsonismo pueden indicar que el paciente tiene un PA y el médico debería buscar cuidadosamente síntomas y signos clínicos que sugieran PSP, AMS o SCB. Otros métodos diagnósticos, como la RM o el PET con fluorodesoxiglucosa, podrían también ayudar a distinguir entre estos parkinsonismos atípicos.<sup>27</sup>

Los pacientes con PA incluidos en las cohortes de Lund y Londres tenían 4-6 años de duración de enfermedad en promedio. Desde un punto de vista clínico, es muy importante establecer métodos diagnósticos que puedan separar los PA de la EP durante las etapas tempranas de la enfermedad. Es importante que los datos obtenidos de la cohorte de enfermedad temprana (con síntomas de 0-3 años de evolución) muestran que el NfL en sangre está aumentado en los PA y que puede separar de forma precisa los PA de la EP, incluso en pacientes con una enfermedad de corta duración.

Este estudio tiene limitaciones. Los diagnósticos de los participantes del estudio estuvieron basados en criterios clínicos y no en exámenes neuropatológicos. Sin embargo, los diagnósticos clínicos fueron realizados por doctores en medicina especializados en movimientos anormales y los pacientes fueron seguidos a lo largo del tiempo con reevaluaciones en cada visita de seguimiento. Esto debería aumentar la precisión diagnóstica realizada en una única visita. En la cohorte de Londres, a 9 pacientes eventualmente se les realizó un examen neuropatológico y el diagnóstico patológico confirmó el diagnóstico clínico en los 9 casos. Es importante decir que cualquier diagnóstico clínico erróneo en este estudio puede haber sido más una subestimación

que una sobreestimación, de la precisión diagnóstica del NfL en sangre para separar la EP de los PA.

Previamente se ha sugerido que los biomarcadores en sangre aumentan la precisión diagnóstica de trastornos neurodegenerativos como la enfermedad de Alzheimer o la AMS, pero estudios subsiguientes no han sido capaces de reproducir estos hallazgos.<sup>4,28,29</sup> Esto resalta la importancia de siempre usar al menos 2 cohortes independientes obtenidas en diferentes clínicas al evaluar biomarcadores. Es importante que en este estudio obtuvimos resultados similares para el NfL en sangre en 3 cohortes independientes, indicando que definitivamente es un marcador fuerte para diferenciar la EP de los PA. Las concentraciones absolutas de NfL difirieron entre las cohortes, probablemente debido a la variación lote-a-lote en el desempeño del ensayo o los efectos de la matriz (plasma vs suero). Por lo tanto, es necesario desarrollar un ensayo clínico graduado completamente automatizado y establecer puntos de corte para implementar las mediciones de NfL en sangre en la práctica clínica.

Este estudio ha mostrado en 3 cohortes independientes que las concentraciones de NfL en sangre están aumentadas en la PSP, la AMS y el SCB, al ser comparadas con la EP y controles sanos. Este biomarcador fácilmente accesible de degeneración axonal puede mejorar el proceso diagnóstico de pacientes con síntomas parkinsonianos en clínicas especializadas y también en centros de atención primaria.

#### CONTRIBUCIONES DE LOS AUTORES

Dres. Hansson, Janelidze, Hall, Magdalinou, Lees, Andreasson, Norgren, Linder, Forsgren, Constantinescu, Zetterberg y Blennow recolectaron los datos y revisaron el manuscrito para su contenido intelectual. Dres. Janelidze y Hansson analizaron e interpretaron los datos y prepararon las figuras. Dres. Janelidze, Hall y Hansson co-escribieron el manuscrito. Dres. Zetterberg y Hansson fueron los diseñadores y coordinadores principales del estudio. Dr. Hansson supervisó la recolección, análisis e interpretación de los datos del estudio.

#### RECONOCIMIENTOS

Los autores agradecen a los pacientes y a las enfermeras de investigación involucrados en el estudio.

#### FONDOS PARA EL ESTUDIO

El estudio fue apoyado por el European Research Council, el Swedish Research Council, The Parkinson Foundation of Sweden, la Swedish Brain Foundation, la Knut and Alice Wallenberg Foundation, la Torsten Söderberg Foundation at the Royal Swedish Academy of Sciences, y el Swedish Federal Government bajo el ALF Agreement. Las fuentes de dinero no tuvieron ningún papel en el diseño y la conducción del estudio; en la recolección, análisis e interpretación de datos; o en la preparación, revisión o aprobación del manuscrito.

#### DECLARACIÓN DE INTERESES

O. Hansson, S. Janelidze, S. Hall, N. Magdalinou, A. Lees y U. Andreasson no tienen nada para declarar relevante al manuscrito. N. Norgren es empleado de UmanDiagnostics AB. J. Linder, L. Forsgren y R. Constantinescu no tienen nada para declarar relevante al manuscrito. H. Zetterberg es cofundador de Brain Biomarker Solutions en Gothenburg AB, una compañía GU Venture-based en la University of Gothenburg. K. Blen-

now es cofundador de Brain Biomarker Solutions en Gothenburg AB, una compañía GU Venture–based en la University of Gothenburg. Dr. Blennow ha servido en comités de consejo o como consultor (no relacionado al trabajo presentado en este estudio) para Eli Lilly, Fujirebio Europe, IBL International, Novartis y Roche Diagnostics. Ir a [Neurology.org](http://Neurology.org) para declaraciones completas.

Recibido el 22 de abril de 2016. Aceptado en su formato final el 15 de noviembre de 2016.

## BIBLIOGRAFÍA

1. Hughes AJ, Daniel SE, Kilford L, Lees AJ. Accuracy of clinical diagnosis of idiopathic Parkinson's disease: a clinicopathological study of 100 cases. *J Neurol Neurosurg Psychiatry* 1992;55:181–184.
2. Tolosa E, Wenning G, Poewe W. The diagnosis of Parkinson's disease. *Lancet Neurol* 2006;5:75–86.
3. Constantinescu R, Rosengren L, Johnels B, Zetterberg H, Holmberg B. Consecutive analyses of cerebrospinal fluid axonal and glial markers in Parkinson's disease and atypical parkinsonian disorders. *Parkinsonism Relat Disord* 2010; 16:142–145.
4. Herbert MK, Aerts MB, Beenes M, et al. CSF neurofilament light chain but not FLT3 ligand discriminates parkinsonian disorders. *Front Neurol* 2015;6:91.
5. Abdo WF, Bloem BR, Van Geel WJ, Esselink RA, Verbeek MM. CSF neurofilament light chain and tau differentiate multiple system atrophy from Parkinson's disease. *Neurobiol Aging* 2007;28:742–747.
6. Hall S, Ohrfelt A, Constantinescu R, et al. Accuracy of a panel of 5 cerebrospinal fluid biomarkers in the differential diagnosis of patients with dementia and/or parkinsonian disorders. *Arch Neurol* 2012;69:1445–1452.
7. Magdalinou NK, Paterson RW, Schott JM, et al. A panel of nine cerebrospinal fluid biomarkers may identify patients with atypical parkinsonian syndromes. *J Neurol Neurosurg Psychiatry* 2015;86:1240–1247.
8. Kuhle J, Barro C, Andreasson U, et al. Comparison of three analytical platforms for quantification of the neurofilament light chain in blood samples: ELISA, electrochemiluminescence immunoassay and Simoa. *Clin Chem Lab Med* 2016;54:1655–1661.
9. Hall S, Surova Y, Ohrfelt A, Zetterberg H, Lindqvist D, Hansson O. CSF biomarkers and clinical progression of Parkinson disease. *Neurology* 2015;84:57–63.
10. Janelidze S, Lindqvist D, Francardo V, et al. Increased CSF biomarkers of angiogenesis in Parkinson disease. *Neurology* 2015;85:1834–1842.
11. Jessen Krut J, Mellberg T, Price RW, et al. Biomarker evidence of axonal injury in neuroasymptomatic HIV-1 patients. *PLoS One* 2014;9:e88591.
12. Norgren N, Rosengren L, Stigbrand T. Elevated neurofilament levels in neurological diseases. *Brain Res* 2003;987:25–31.
13. Gisslén M, Richard WP, Andreasson U, et al. Plasma concentration of the neurofilament light protein (NFL) is a biomarker of CNS injury in HIV Infection: a cross-sectional study. *EBioMedicine* 2016;3:135–140.
14. Gaiottino J, Norgren N, Dobson R, et al. Increased neurofilament light chain blood levels in neurodegenerative neurological diseases. *PLoS One* 2013;8:e75091.
15. Lu CH, Macdonald-Wallis C, Gray E, et al. Neurofilament light chain: a prognostic biomarker in amyotrophic lateral sclerosis. *Neurology* 2015;84:2247–2257.
16. Rojas JC, Karydas A, Bang J, et al. Plasma neurofilament light chain predicts progression in progressive supranuclear palsy. *Ann Clin Transl Neurol* 2016;3:216–225.
17. Bacioglu M, Maia LF, Preische O, et al. Neurofilament light chain in blood and CSF as marker of disease progression in mouse models and in neurodegenerative diseases. *Neuron* 2016;91:56–66.
18. Petzold A. Neurofilament phosphoforms: surrogate markers for axonal injury, degeneration and loss. *J Neurol Sci* 2005;233:183–198.
19. Hjalmarsson C, Bjerke M, Andersson B, et al. Neuronal and glia-related biomarkers in cerebrospinal fluid of patients with acute ischemic stroke. *J Cent Nerv Syst Dis* 2014;6:51–58.
20. Neselius S, Brisby H, Theodorsson A, Blennow K, Zetterberg H, Marcusson J. CSF-biomarkers in Olympic boxing: diagnosis and effects of repetitive head trauma. *PLoS One* 2012;7:e33606.
21. Steinacker P, Feneberg E, Weishaupt J, et al. Neurofilaments in the diagnosis of motoneuron diseases: a prospective study on 455 patients. *J Neurol Neurosurg Psychiatry* 2015;87:12–20.
22. Scherling CS, Hall T, Berisha F, et al. Cerebrospinal fluid neurofilament concentration reflects disease severity in frontotemporal degeneration. *Ann Neurol* 2014;75:116–126.
23. Skillback T, Farahmand B, Bartlett JW, et al. CSF neurofilament light differs in neurodegenerative diseases and predicts severity and survival. *Neurology* 2014;83:1945–1953.
24. Sajjadi SA, Acosta-Cabronero J, Patterson K, Diaz-de-Greñu LZ, Williams GB, Nestor PJ. Diffusion tensor magnetic resonance imaging for single subject diagnosis in neurodegenerative diseases. *Brain* 2013;136:2253–2261.
25. Surova Y, Szczepankiewicz F, Latt J, et al. Assessment of global and regional diffusion changes along white matter tracts in parkinsonian disorders by MR tractography. *PLoS One* 2013;8:e66022.
26. Tsukamoto K, Matsusue E, Kanasaki Y, et al. Significance of apparent diffusion coefficient measurement for the differential diagnosis of multiple system atrophy, progressive supranuclear palsy, and Parkinson's disease: evaluation by 3.0-T MR imaging. *Neuroradiology* 2012;54:947–955.
27. Holtbernd F, Eidelberg D. The utility of neuroimaging in the differential diagnosis of parkinsonian syndromes. *Semin Neurol* 2014;34:202–209.
28. Bjorkqvist M, Ohlsson M, Minthon L, Hansson O. Evaluation of a previously suggested plasma biomarker panel to identify Alzheimer's disease. *PLoS One* 2012;7:e29868.
29. Silajdzic E, Minthon L, Bjorkqvist M, Hansson O. No diagnostic value of plasma clusterin in Alzheimer's disease. *PLoS One* 2012;7(11):e50237.
